# Supplementary material
Source: publisher site journal article supplement (https://www.dovepress.com/article/256338)
Supplement: Supplementary file 1 [file get_supplementary_file.php]

**Appendix 1: The reflective writing-based portfolio-scoring rubric**

| **Criterion** | **2 points** | **1 Point** | **0 point** |
| --- | --- | --- | --- |
| **Organization and quality of presentation** | Organized(title page, table of contents, use of headings and subheadings) & well presented (clear, appropriate tone, free of spelling/ grammatical errors) | Partially organized and/or poor quality of presentation | Disorganized & not well presented (lacks clarity, adopts inappropriate tone, lacks structure, contains spelling/ grammatical errors ) |
| **Description of an experience** | The selected events are explicitly and appropriately linked with the curricular themes. Descriptions of events are coherent (detailed and focused) and flow smoothly; rich in contextual details; and draw upon vivid and specific examples. | The selected events are implicitly and partially linked with the curricular themes. Descriptions of events show a degree of coherence, but inconsistent in flow; contain some contextual details but without elaboration; and minimal use of examples. | The selected events are not explicitly or appropriately linked with the curricular themes.  Descriptions of events are incoherent (not detailed and not focused) and do not flow smoothly; do not provide adequate contextual details and/or specific examples. |
| **Reflection on an experience:** demonstrates and provides a supporting evidence of the following 3 main characteristics | | | |
| **Critical awareness of self and others** | Demonstrates understanding of the interrelation between self and others. Demonstrates an ability to recognize own and others’ strengths and weaknesses as a basis for learning and improving practice. Demonstrates an understanding that situations can be viewed and interpreted differently depending on the perspective of the person involved. | Demonstrates partial awareness of the interrelation between self and others | Absence of awareness of the interrelation between self and others |
| **Experiential knowledge** | Communicates how experiencing (feelings, thoughts, fears, internal dialogue) or witnessing an event has changed or reinforced one’s perspectives. Transforms new knowledge to inform future action and provides specific details of goals and plans. Explores alternative ways of solving problems/decision-making based on a combination of knowledge and experience | Demonstrates partial experiential knowledge | Absence of experiential knowledge |
| **Ability to identify and manage uncertainty** | Takes initiative and discusses implications of risk-taking. Identifies and reports mistakes and errors of judgement (own or others’) and discusses potential causes and consequences. Identifies and navigates multifaceted problems for which there is no ideal solution | Ability to partially identify and manage uncertainty or ambivalence | Absence of the ability to identify and manage uncertainty or ambivalence |
